# Supplementary material
Source: publisher figshare collection journal article supplement (https://springernature.figshare.com/ndownloader/files/31414782)
Supplement: Supplementary file [file 31414782]

**PangenomeNet: A Pan-genome-based Network Reveals Functional Modules on Antimicrobial Resistome for *Escherichia coli* Strains**

Hsuan-Lin Her, Po-Ting Lin, and Yu-Wei Wu

Supplementary Materials

Supplementary Figures S1-S8

Supplementary Table S1-S10

All resistome network is available on Ndex (Network data exchange):

<http://www.ndexbio.org/#/networkset/67b112d7-a23b-11eb-9e72-0ac135e8bacf?accesskey=954cbaa3fd709f9991a8e06248c939a5a391c7ad9cc72b675d5cefe3c175bfc1>

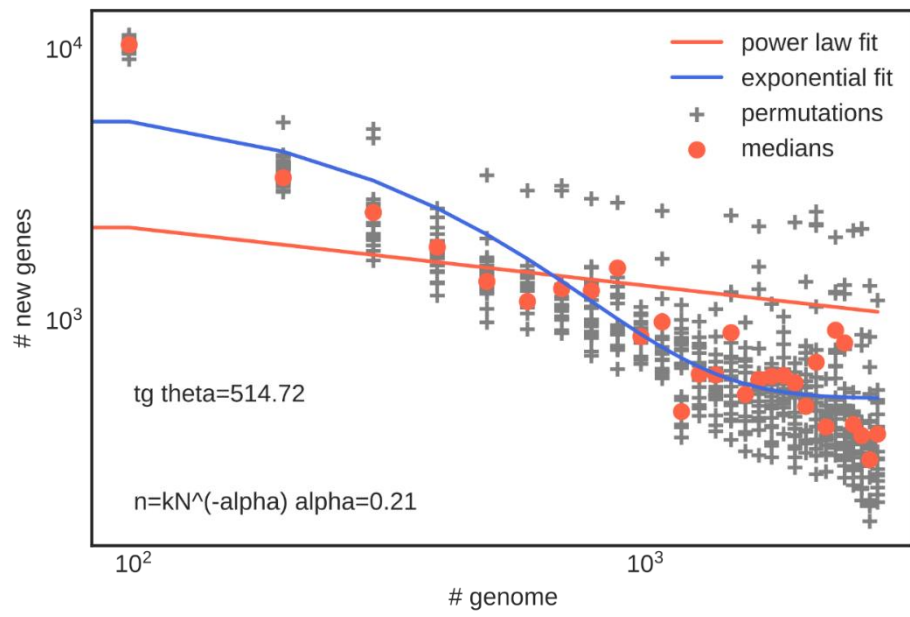

Supplementary Figure S1. Pan-genome growth curve fitting.

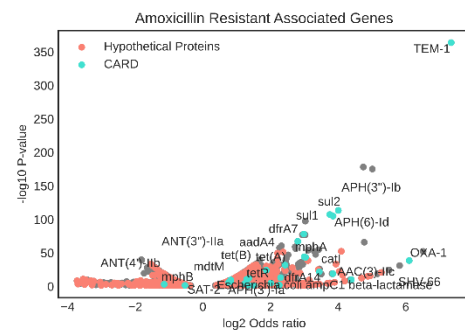

Supplementary Figure S2. Hypothetical genes involve in multiple antibiotic resistance.

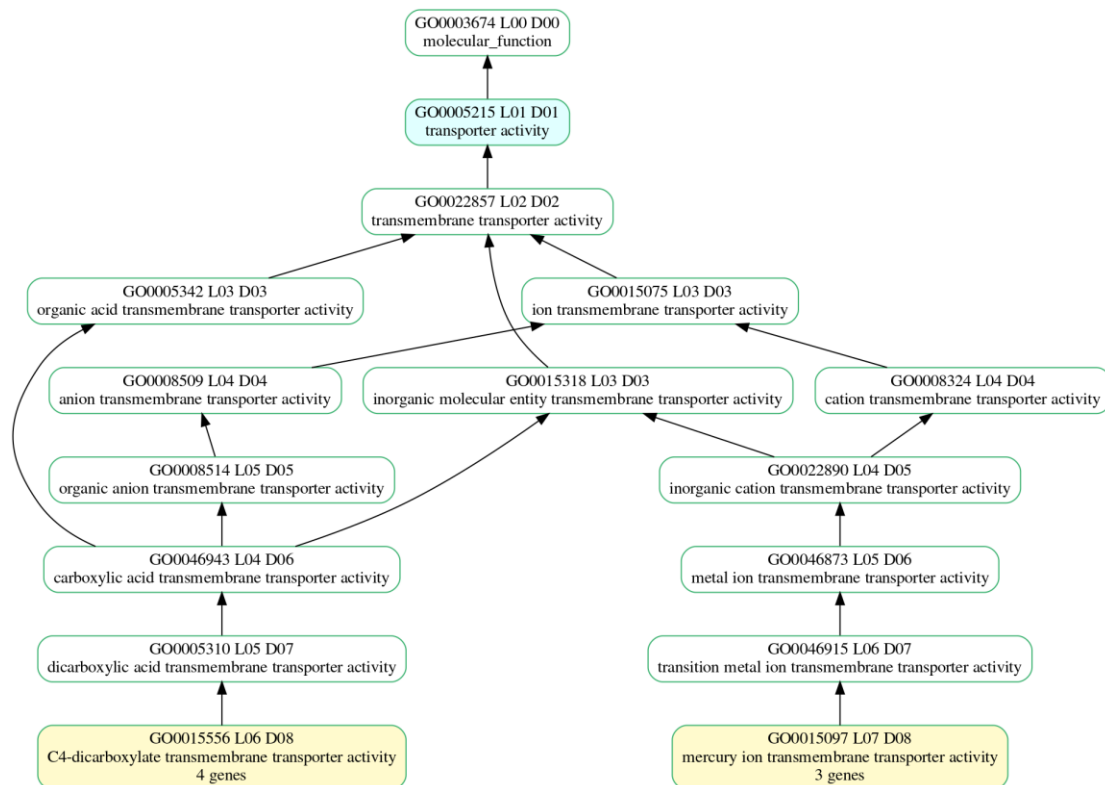

Supplementary Figure S3. GO enrichment analysis of meropenem resistance associated genes.

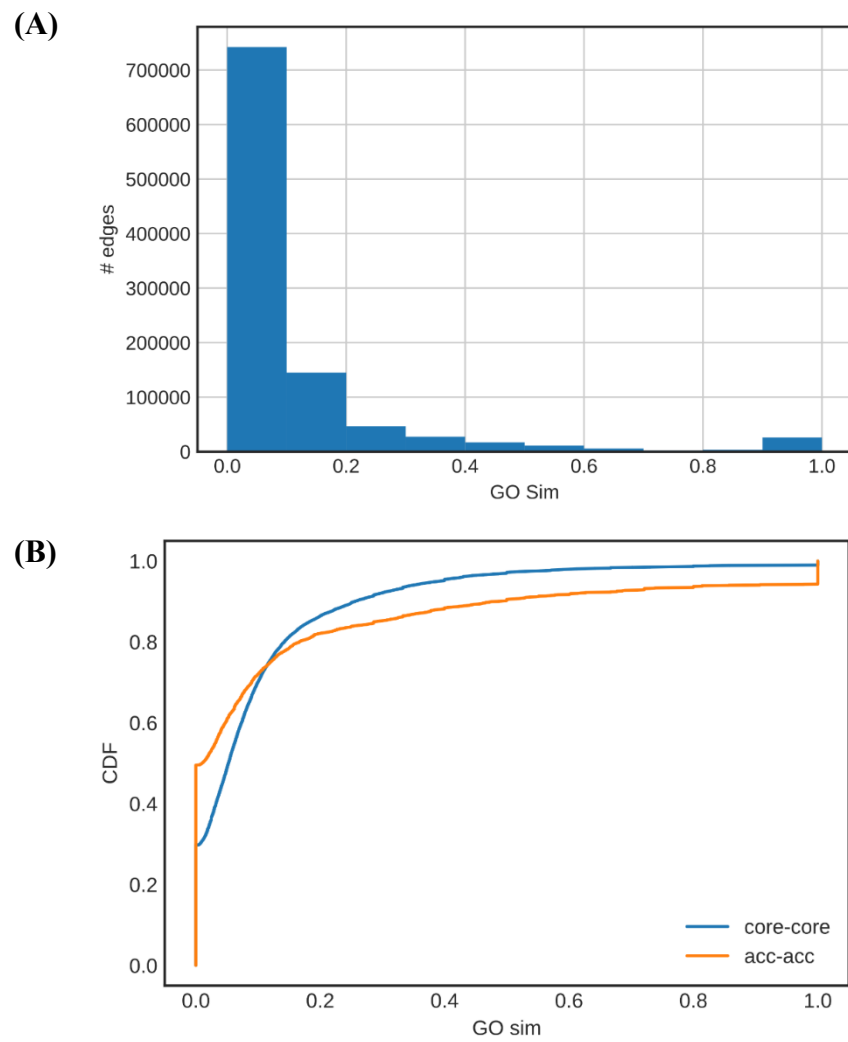

Supplementary Figure S4. GO term similarity score distribution of (A) all gene pairs; (B) cumulative distribution of core-core and accessory-accessory edges.

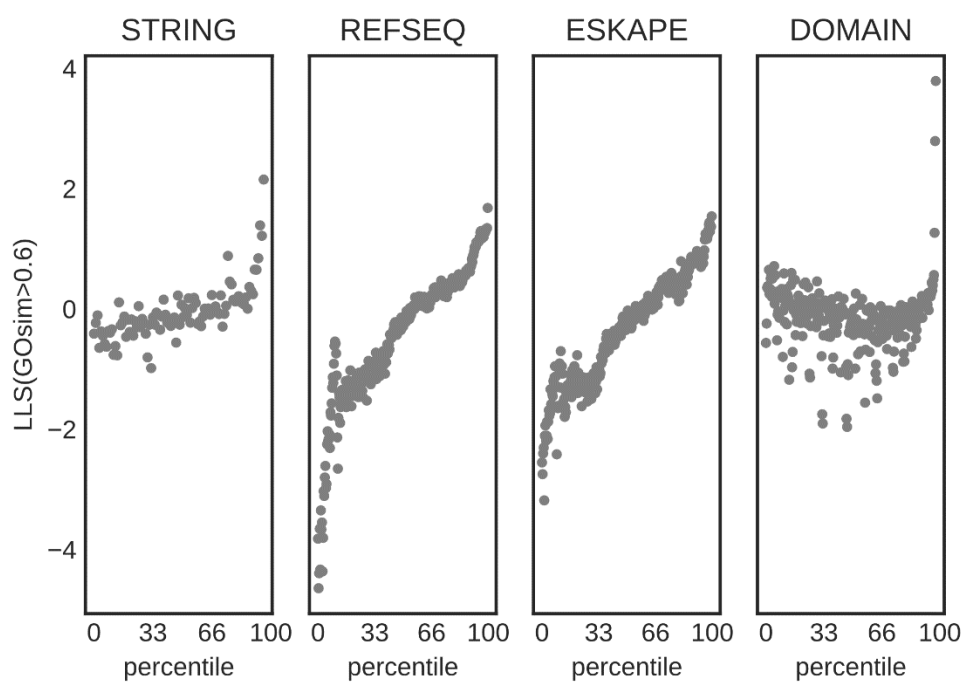

Supplementary Figure S5. The distribution of individual networks (including STRING, RefSeq, ESKAPE, and Domain-sharing networks) associated with log-likelihood scores (LLS; with GO term similarity > 0.6).

(A)

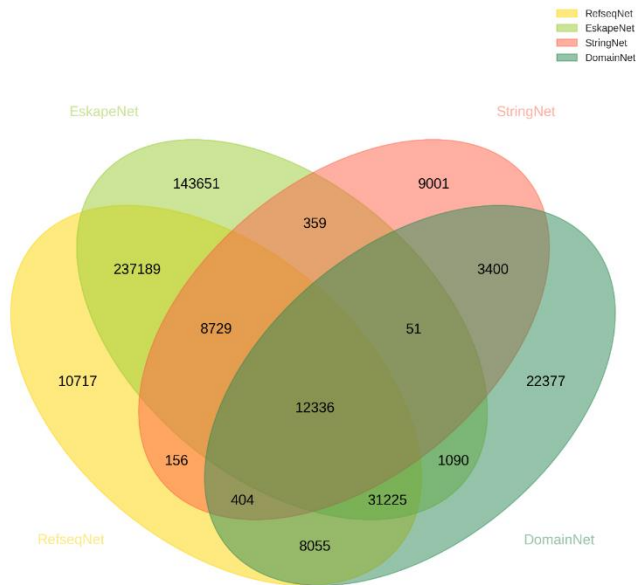

**(B)**

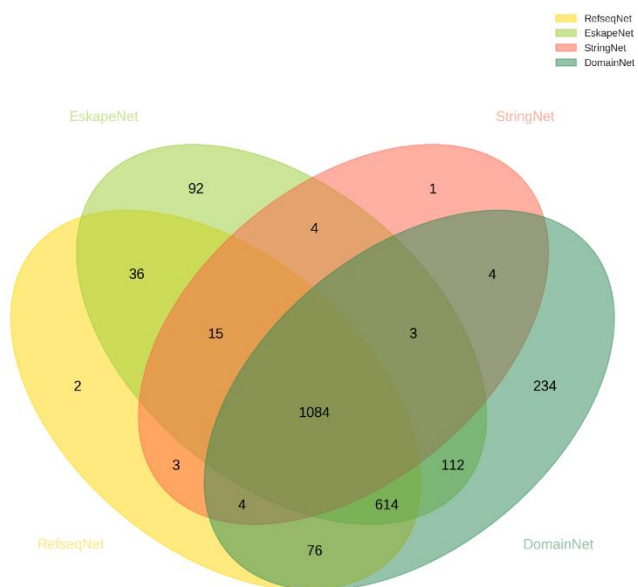

(C)

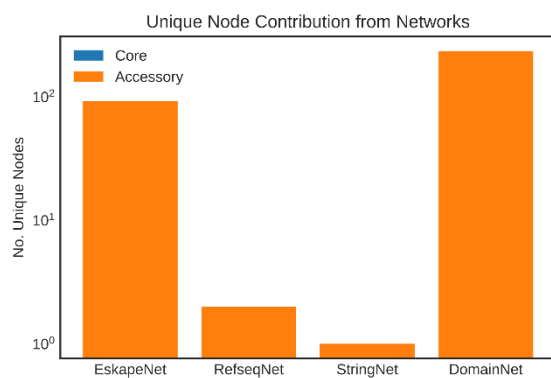

Supplementary Figure S6. (A) Edge and (B) node contribution of each network (C) Unique nodes are all accessory genes.

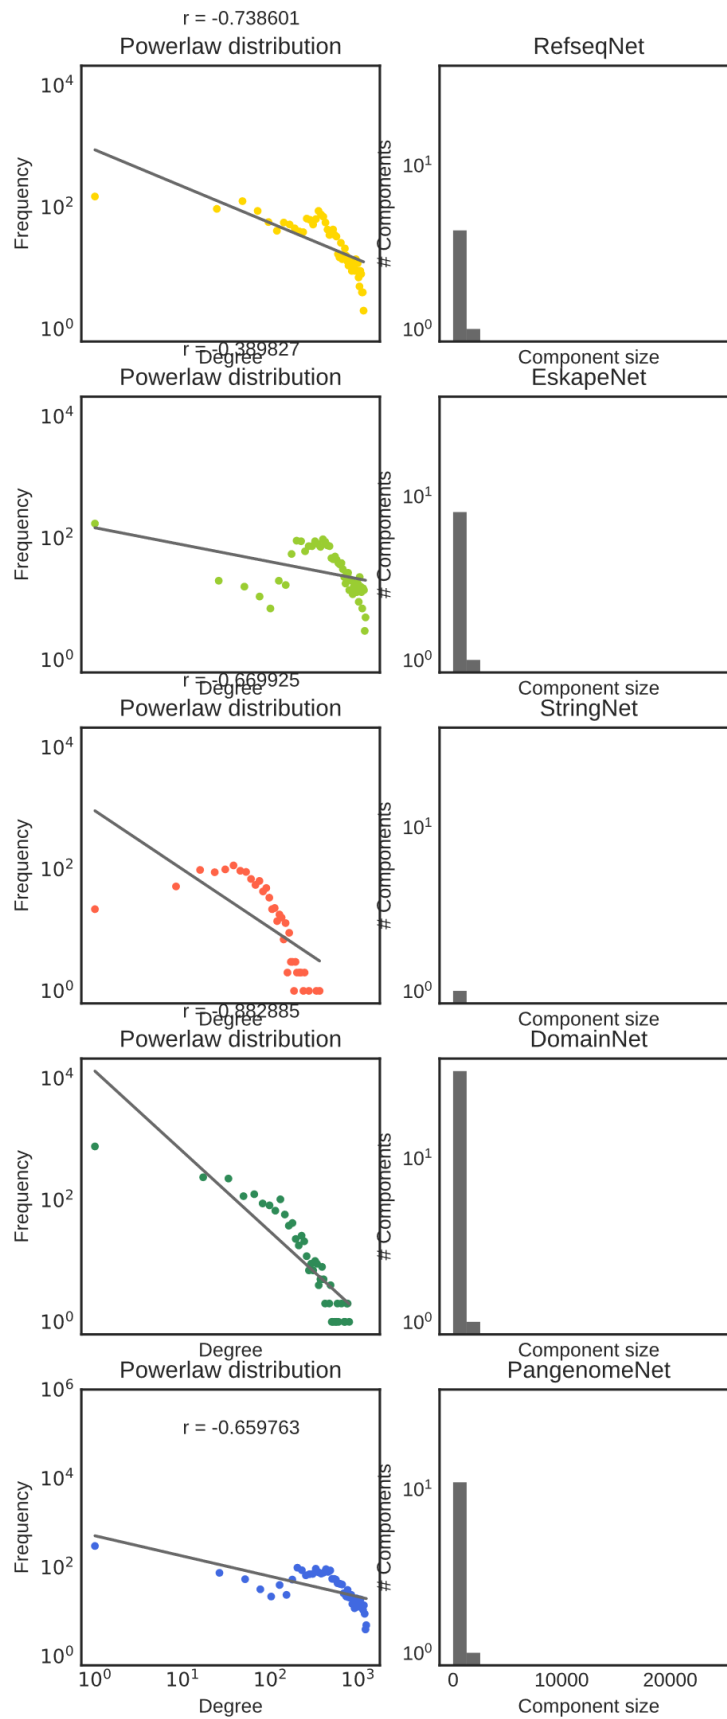

Figure S7 Power-law distributions and component sizes of all networks.



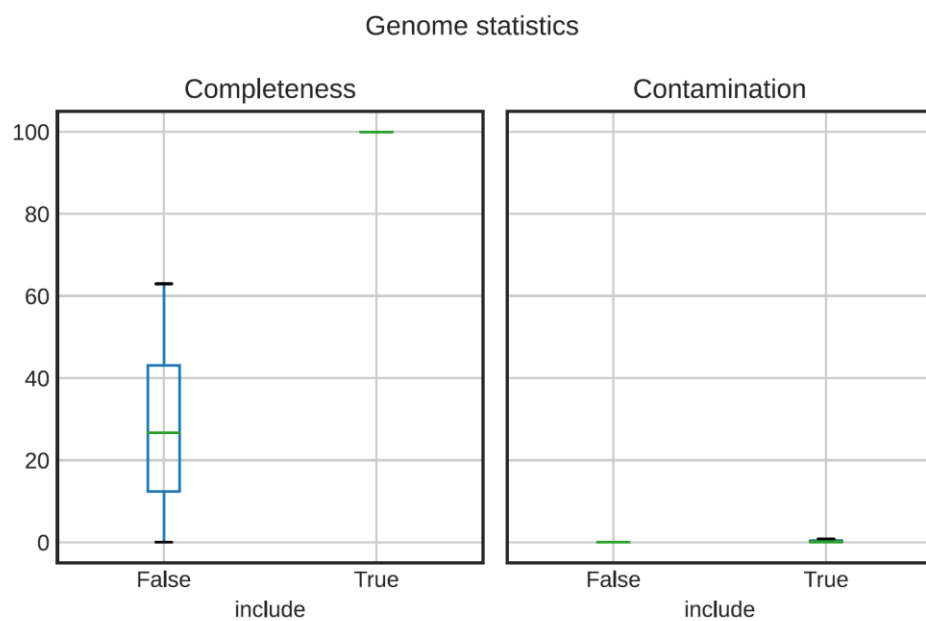

Figure S8 Genome statistics of the excluded and included genomes.

## Supplementary Tables

**Table S1** Genome ID and statistics for *Escherichia coli* genome downloaded from PATRIC on February 2021

**Table S2** Gene cluster annotation of the pan-genome

**Table S3** Scoary-detected resistant gene annotation statistics

**Table S4** GO enrichment results for all Scoary-detected resistant genes

**Table S5** Resistant gene subnetwork scores. Node annotation are in Table S6

**Table S6** All resistant gene annotation.

**Table S7** Term enrichment result for the pan-resistome ontology

Table S8 Pan-genome GO term consistency under different amino acid cutoff

Table S9 Presence Absence pattern of all genes in the pan-genome across all *E.coli* species included in this paper.

File S10 FASTA file for representing gene of all pan-genome

All Tables are available in .csv/excel format on figshare

[https://figshare.com/articles/dataset/Supplementary\\_tables\\_for\\_PangenomeNet/14460252](https://figshare.com/articles/dataset/Supplementary_tables_for_PangenomeNet/14460252).
